# Supplementary material for: TGF-β signaling alters H4K20me3 status via miR-29 and contributes to cellular senescence and cardiac aging
Source: PubMed Central journal article supplement (PMC6028646; doi:10.1038/s41467-018-04994-z), 2018-07-02
Supplement: 41467_2018_4994_MOESM1_ESM.pdf [file 41467_2018_4994_MOESM1_ESM.pdf]

1 **TGF- $\beta$  signaling alters H4K20me3 status via miR-29 and contributes to cellular**  
2 **senescence and cardiac aging**

3 Guoliang et al.

4

5

6

7

8

9

10

11

12

13

14

15

16

17

18

19

20

21

22

23

24

25

26

27

28

29

30

31

32  
33  
34  
35  
36  
37  
38  
39  
40  
41  
42  
43  
44  
45  
46  
47  
48  
49  
50  
51  
52  
53  
54  
55  
56  
57  
58  
59  
60  
61  
62

**Supplementary Figures**

63

64

65

66

67

68

69

70

71

72

73

74

75

76

77

78

79

80

81

82

83

84

85

86

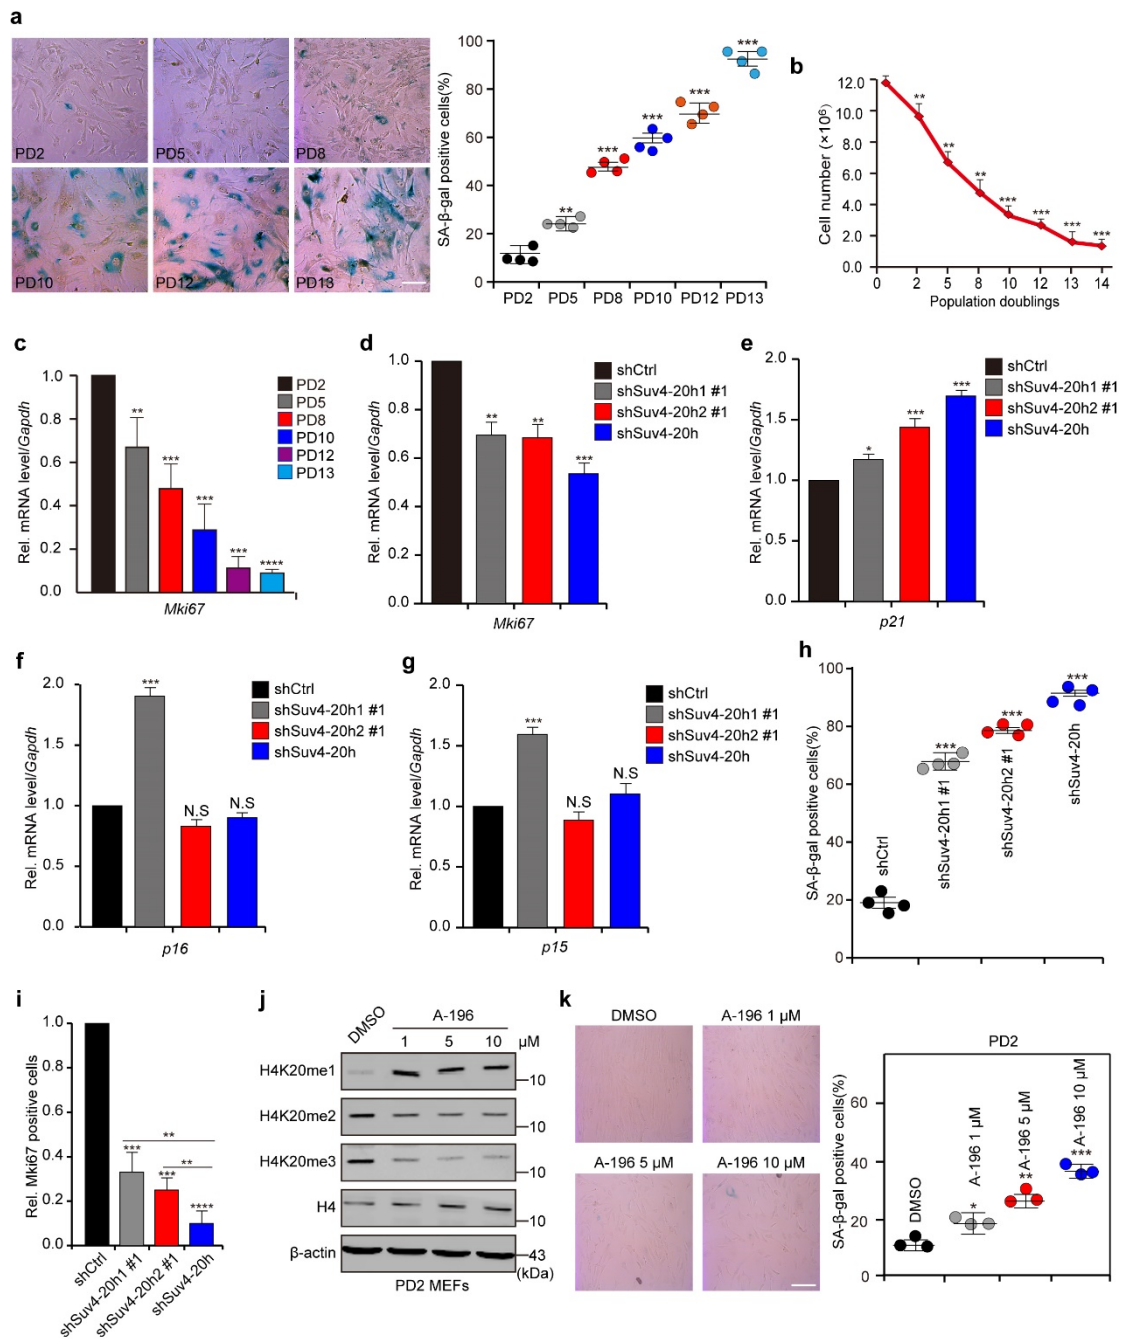

87 **Supplementary Figure 1. Loss of H4K20me3 promotes emergence of senescent**  
 88 **phenotypes.**

89 **a-c**, MEFs progressively accumulated positive SA-β-gal stained cells and showed a  
 90 decreased proliferation rate over time. MEFs from different growth stages were  
 91 subjected to SA-β-gal staining (**a**), growth curve analysis (**b**) and *Mki67* measurement  
 92 by RT-qPCR (**c**). Scale bar, 20 μm. \*\**p*<0.01, \*\*\**p*<0.001 (One-way ANOVA with  
 93 Dunnett's multiple comparison test). **d-g**, RT-qPCR measurements of *Mki67* (**d**), *p21*

94 (e), p16 (f), and p15 (g) in Suv4-20h1 knockdown (shSuv4-20h1), Suv4-20h2  
95 knockdown (shSuv4-20h2) or both (shSuv4-20h) cells. **h**, Statistical analysis of SA- $\beta$ -  
96 gal staining in **Figure. 1i**. **i**, Statistical analysis of the Mki67 signal in **Figure. 1j**. **j**,  
97 Western blot for changes in H4K20 methylation in cells treated with the indicated doses  
98 of A-196.  $\beta$ -actin served as a loading control. **k**, Cells from **j** were subjected to SA- $\beta$ -  
99 gal staining (left) and analyzed (right, One-way ANOVA with Dunnett's multiple  
100 comparison test). Scale bar, 20  $\mu$ m. The error bars represent the s.d. obtained from  
101 triplicate independent experiments. Two-tailed unpaired Student's t-tests were  
102 performed. \*\*p<0.01, \*\*\*p<0.001.

103

104

105

106

107

108

109

110

111

112

113

114

115

116

117

118

119

120

121

122

123

124

125

126

127

128

129

130

131

132

133

134

135

136

137

138

139

140

141

142

143

144

145

146

147

148

149

150

151

152

**a** Mouse *Suv4-20h1* 3' UTR (2714bp) and Predicted miRNA Target Sites

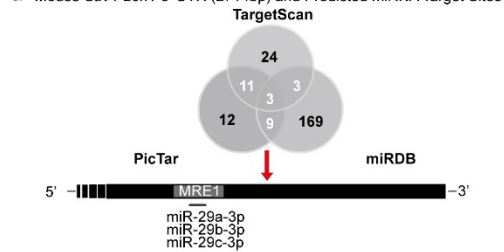

**b** Mouse *Suv4-20h2* 3' UTR (613bp) and Predicted miRNAs Target Sites

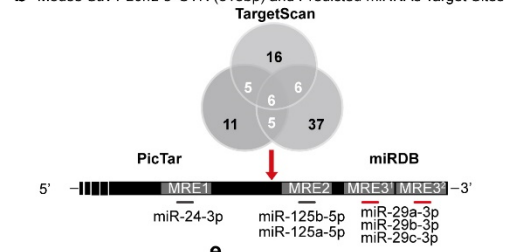

**c**

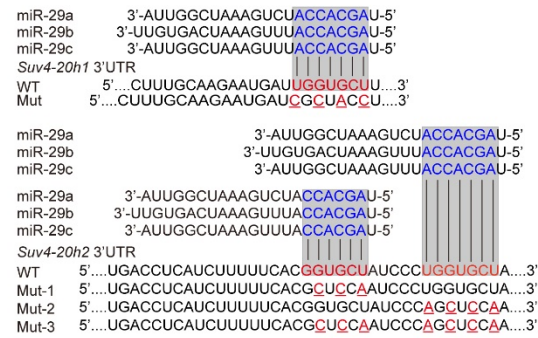

**d**

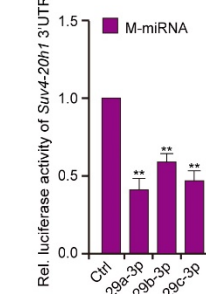

**e**

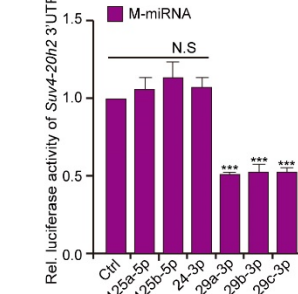

**f**

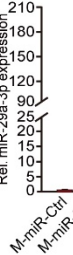

**g**

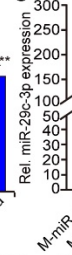

**h**

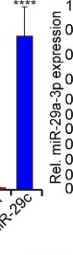

**i**

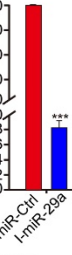

**j**

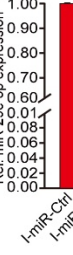

**m**

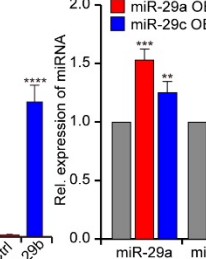

**p**

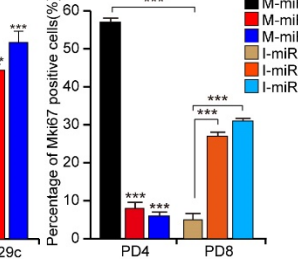

**n**

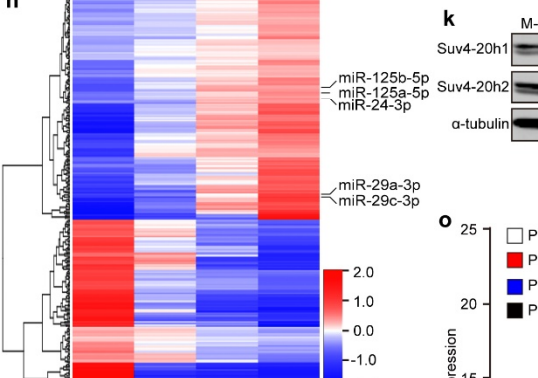

**k**

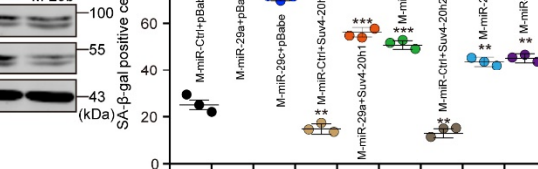

**q**

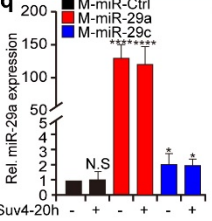

**r**

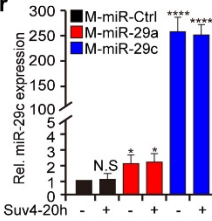

**o**

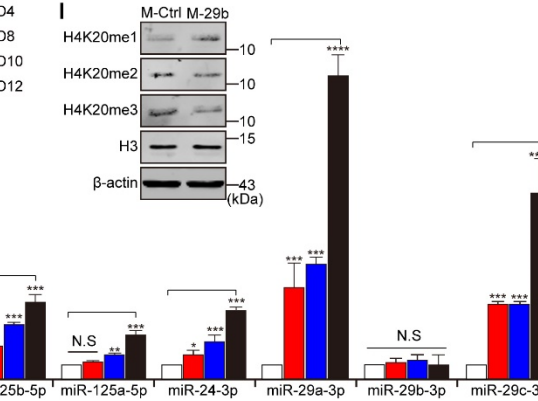

**l**

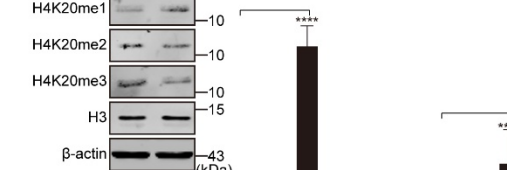

**Supplementary Figure 2. miR-29 targets Suv4-20h to accelerate cellular senescence.**

**a, b**, Schematic diagrams showing the of miRNAs predicted to target the 3' UTR of

156 *Suv4-20h1* (**a**) or *Suv4-20h2* (**b**) by analyzing three different miRNA databases  
157 (TargetScan, PicTar and miRDB). **c**, Representative mode of miR-29 targeting the 3'  
158 UTRs of *Suv4-20h1* and *Suv4-20h2*. **d, e**, Luciferase activity assays showed cells co-  
159 transfected with miRNA mimics and constructs containing the 3' UTR of *Suv4-20h1* (**d**)  
160 or 3' UTR of *Suv4-20h2* (**e**). **f-j**, RT-qPCR showed expression of the indicated miRNA  
161 after transfection with the corresponding miRNA mimics or inhibitors. **k, l**, Western  
162 blots showed changes in Suv4-20h protein (**k**) and H4K20 methylation (**l**).  $\alpha$ -tubulin  
163 and  $\beta$ -actin served as loading controls. **m**, RT-qPCR measurements of lentivirus-  
164 induced expression of miR-29. **n, o**, Differential miRNA profiling (**n**) and RT-qPCR  
165 measurement (**o**) of the indicated miRNAs during MEFs senescence. **p**, Statistical  
166 analysis of Mki67-positive cells from **Figure 2f,j**. **q, r**, RT-qPCR analysis of miR-29  
167 expression in cells with mimic-mediated expression of miR-29 followed by  
168 reintroduction of Suv4-20h. **s**, Statistical analysis of SA- $\beta$ -gal staining from **Figure 2i**  
169 (One-way ANOVA with Dunnett's multiple comparison test). The error bars represent  
170 the s.d. obtained from triplicate independent experiments. Two-tailed unpaired  
171 Student's t-tests were performed. \*\*p<0.01, \*\*\*p<0.001.

172

173

174

175

176

177

178

179

180

181

182

183

184

185

186

187

188

189

190

191

192

193

194

195

196

197

198

199

200

201

202

203

204

205

206

207

208

209

210

211

212

213

214

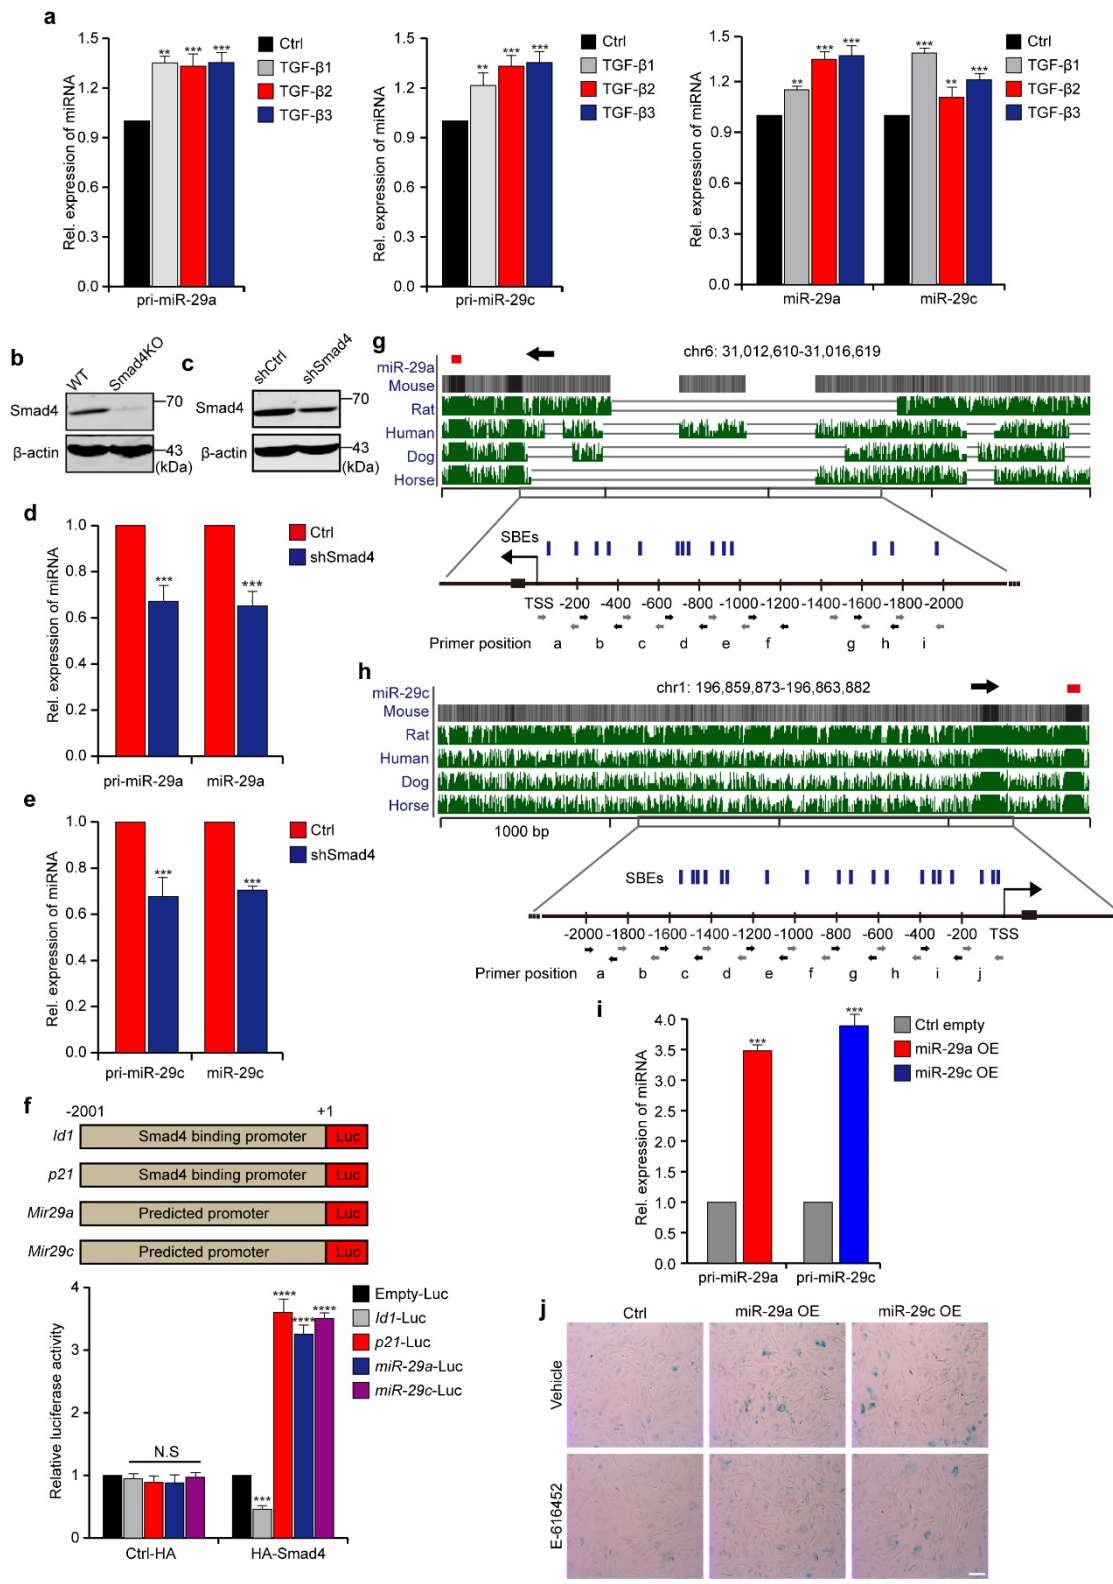

215 **Supplementary Figure 3. TGF-β signaling regulates transcription of *Mir29* in a**

216 **Smad-dependent manner during MEFs senescence.**

217 **a, RT-qPCR measurement of miR-29 expression in cells treated with or without TGF-**

218  $\beta 1/\beta 2/\beta 3$ . **b, c**, Knockout (**b**) or knockdown (**c**) of Smad4 was confirmed by western  
219 blotting. **d, e**, RT-qPCR measurement of miR-29a (**d**) and miR-29c (**e**) upon Smad4  
220 knockdown. **f**, Luciferase assays showed cells co-transfected with Smad4 and fused  
221 constructs containing the predicted promoters. **g, h**, Bioinformatics analysis of *Mir29a*  
222 (**g**) and *Mir29c* (**h**) about SBEs residing in the predicted promoters. The arrows show  
223 the transcription directions. The letters represent the primer positions for ChIP. **i**, RT-  
224 qPCR to measure miR-29 expression following lentivirus-mediated expression of miR-  
225 29. **j**, Cells with ectopic expression of miR-29 were subjected to SA- $\beta$ -staining. The  
226 error bars represent the s.d. obtained from triplicate independent experiments. Two-  
227 tailed unpaired Student's t-tests were performed. \*\*p<0.01, \*\*\*p<0.001.

228

229

230

231

232

233

234

235

236

237

238

239

240

241

242

243

244

245

246

247

248



249

250

251

252

253

254

255

256

257

258

259

260

261

262

263

264

265

266

267

268

269

270

271

272

273

274

275

276

277

278 **Supplementary Figure 4. Hyperoxia-induced oxidative stress activates TGF- $\beta$**

279 **signaling to accelerate senescence.**

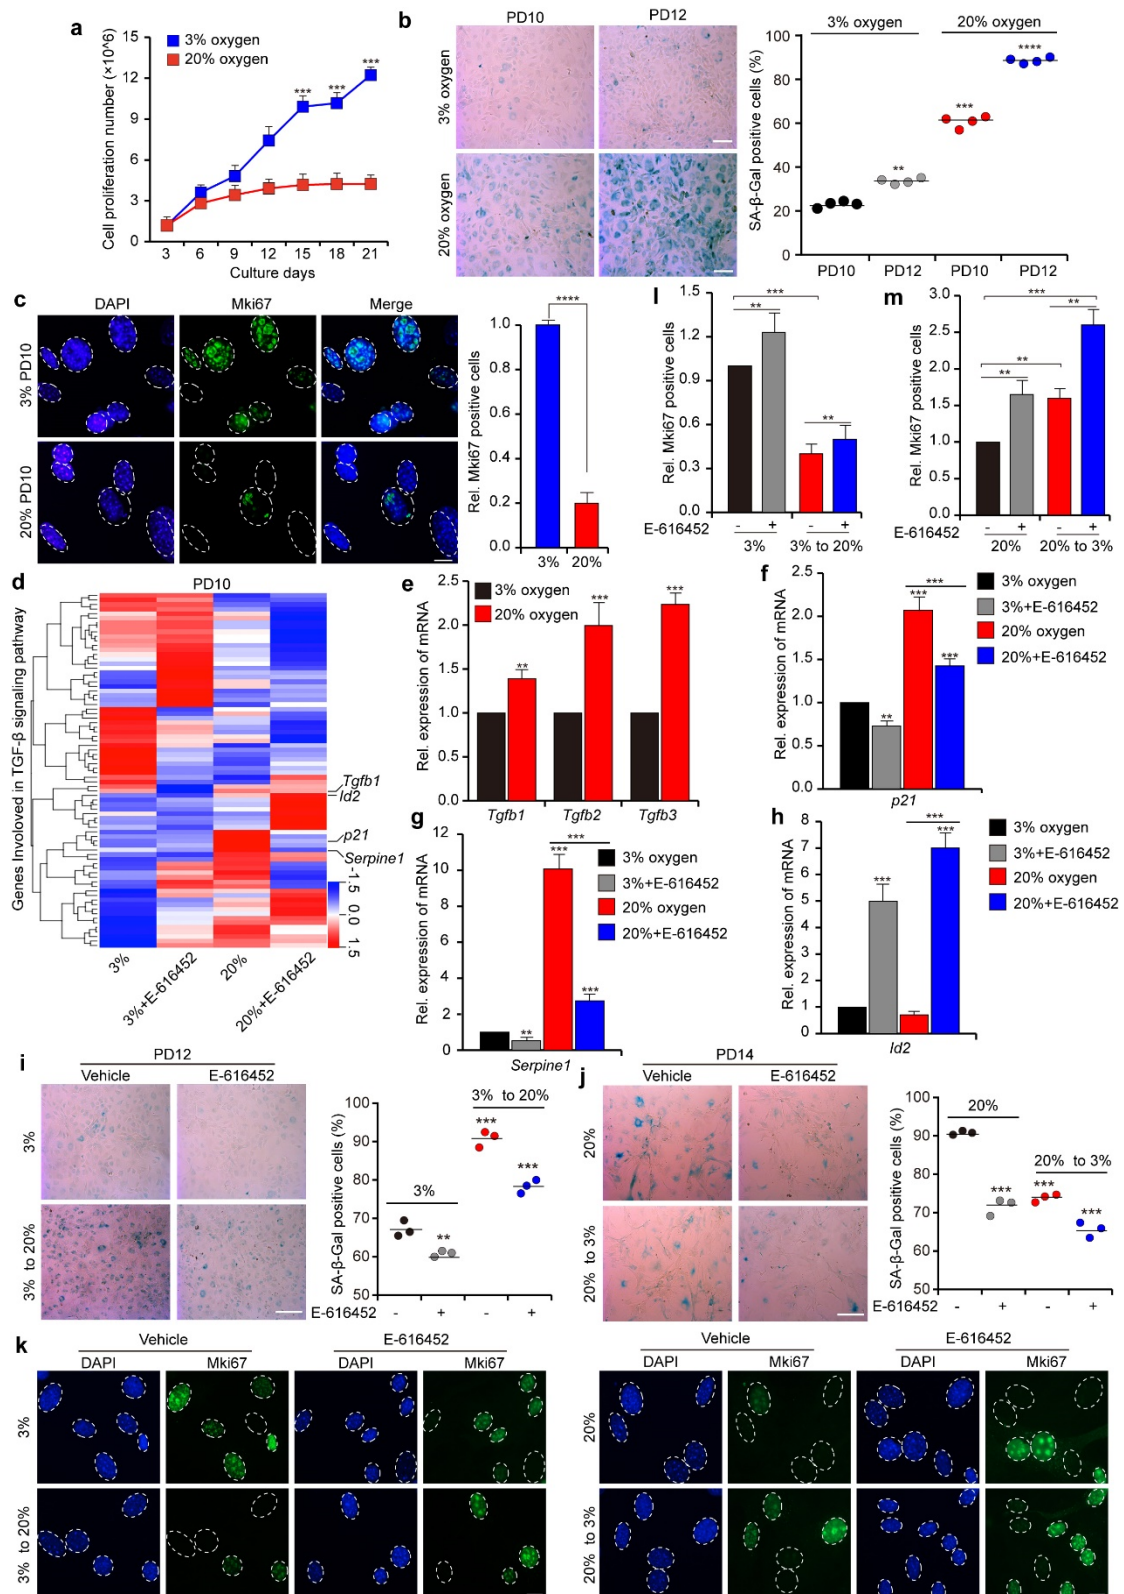

280 **a**, The growth curves showed the differences in the proliferation rates of MEFs cultured  
281 under physioxia (3% oxygen) and relative hyperoxia (20% oxygen). **b**, Cells from PD10  
282 and PD12 incubated in 3% or 20% oxygen were subjected to SA- $\beta$ -gal staining. Scale  
283 bar, 20  $\mu$ m. One-way ANOVA with Dunnett's multiple comparison test was performed.  
284 **c**, PD10 MEFs grown in 3% oxygen and 20% oxygen were used to immunofluorescent  
285 staining analysis of Mki67. Scale bar, 5  $\mu$ m. Two-tailed unpaired Student's t-tests were  
286 performed. **d**, PD10 MEF cells grown in 3% or 20% oxygen, with or without inhibitors  
287 were collected for analysis of differential mRNA transcript expression. **e-h**, RT-qPCR  
288 measurement validated the mRNA expression results from **d**. **i, j**, MEFs grown in 3%  
289 oxygen and transferred to 20% oxygen (**i**), as well as MEFs cultured in 20% oxygen  
290 and transferred to 3% oxygen (**j**), were treated with or without inhibitors and subjected  
291 to SA- $\beta$ -gal staining. Scale bar, 20  $\mu$ m. One-way ANOVA with Dunnett's multiple  
292 comparison test was performed. **k-m**, Immunofluorescent staining analysis of the  
293 Mki67 signal of MEFs with the same treatment as in **j**. Graphs with p-values are  
294 representatives of triplicate independent experiments. \*\*p<0.01, \*\*\*p<0.001,  
295 \*\*\*\*p<0.0001.

296

297

298

299

300

301

302

303

304

305

306

307

308

309

310

311  
 312  
 313  
 314  
 315  
 316  
 317  
 318  
 319  
 320  
 321  
 322  
 323  
 324  
 325  
 326  
 327  
 328  
 329  
 330  
 331  
 332  
 333  
 334  
 335  
 336  
 337  
 338  
 339  
 340  
 341

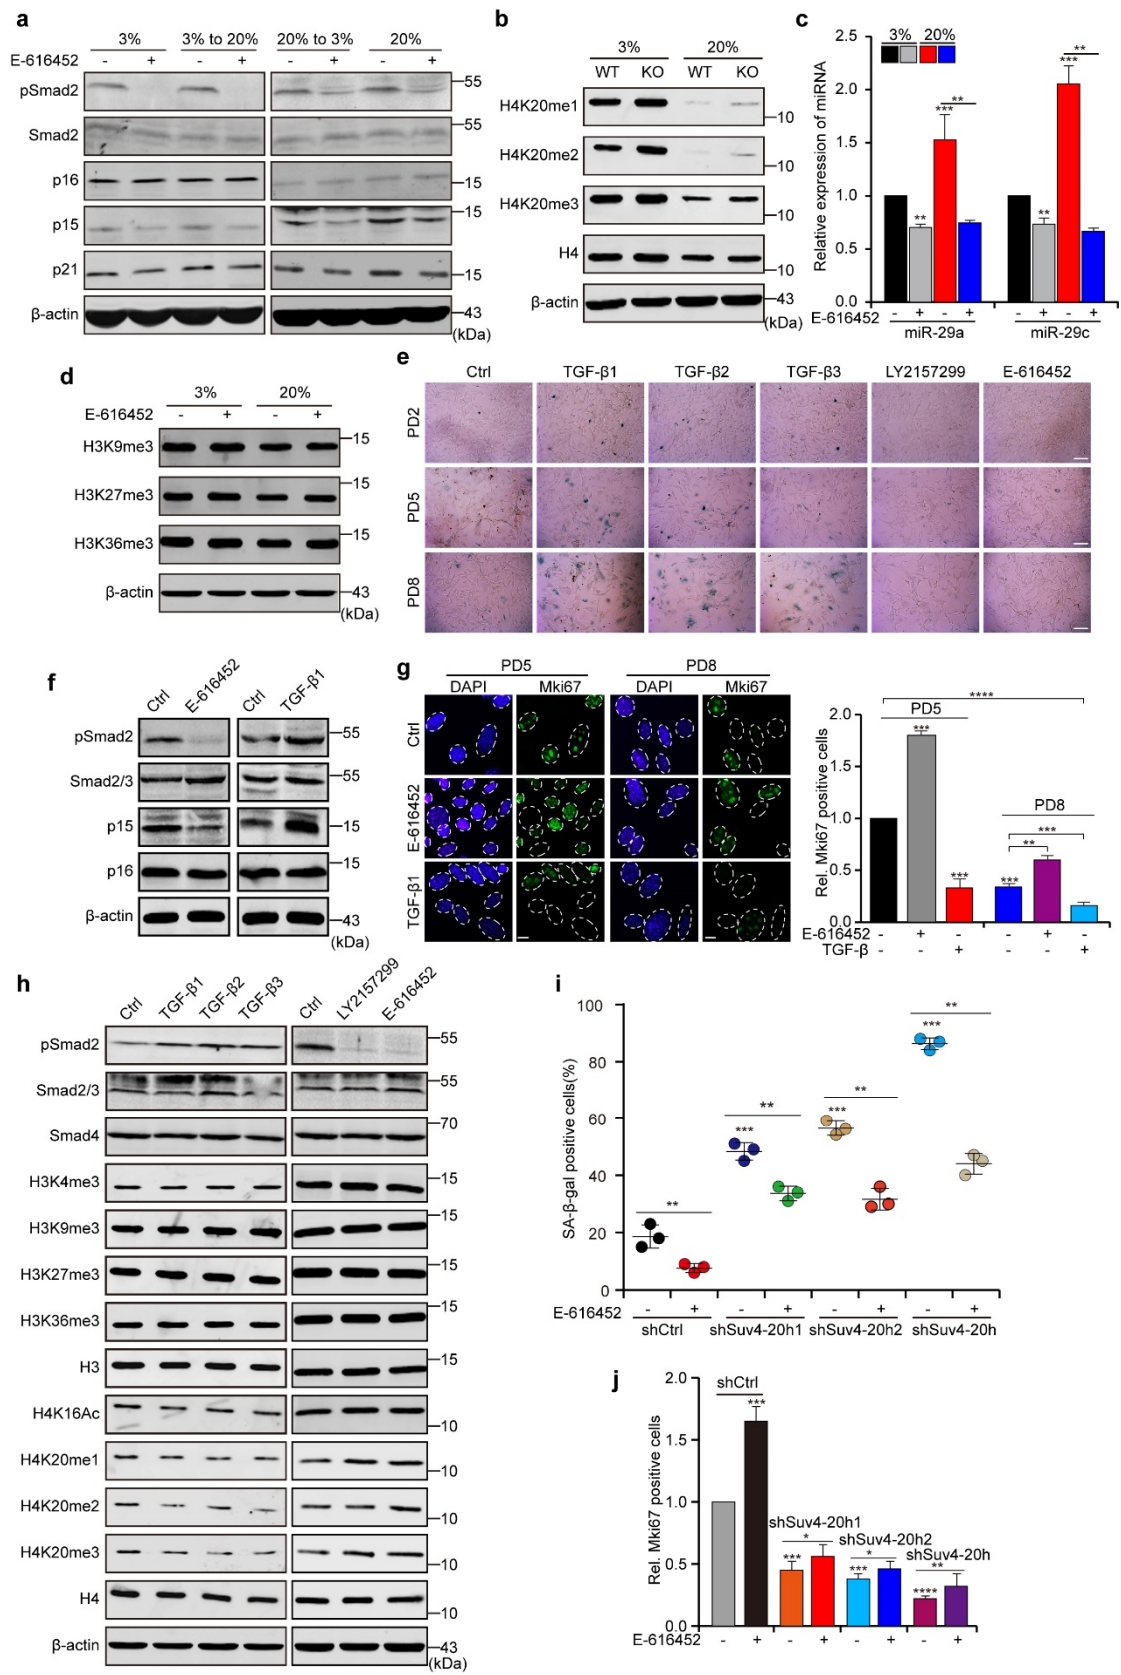

Supplementary Figure 5. TGF-β signaling regulates senescence by reducing

342 **H4K20me3 abundance.**

343 **a**, Western blots showed protein changes in MEFs grown in 3% or 20% oxygen.  $\beta$ -actin  
344 served as a loading control. **b**, Western blots showed changes in H4K20 methylation in  
345 MEFs grown in 3% or 20% oxygen upon Smad4 knockout (KO). WT is designated for  
346 wild-type.  $\beta$ -actin served as a loading control. **c**, RT-qPCR measurement of miR-29  
347 expression in MEFs grown in 3% or 20% oxygen under treatment with or without E-  
348 616452. **d**, Western blot for alterations of histone modifications in cells cultured in 3%  
349 or 20% oxygen in the presence or absence of E-616452.  $\beta$ -actin served as a loading  
350 control. **e**, MEFs from PD2, PD5 and PD8 treated with TGF- $\beta$  or inhibitors (LY2157299  
351 and E-616452) were subjected to SA- $\beta$ -gal staining. Scale bar, 20  $\mu$ m. **f**, Western blot  
352 for confirmation of the efficacy of the treatments with E-616452 or TGF- $\beta$ . **g**,  
353 Immunofluorescent microscopy for Mki67 staining in PD5 and PD8 MEFs (left) with  
354 the same treatment as in **f**. Signals were analyzed by ImageJ software (right). Student's  
355 t-test was applied. Scale bar, 5  $\mu$ m. **h**, Western blot for the indicated proteins in cells  
356 with the same treatment as in **e**.  $\beta$ -actin served as a loading control. **i**, Statistical analysis  
357 of the SA- $\beta$ -gal staining in **Figure 4g**. One-way ANOVA with Dunnett's multiple  
358 comparison test was performed. **j**, Statistical analysis of the Mki67-positive cells in  
359 **Figure 4h**. The error bars represent the s.d. obtained from triplicate independent  
360 experiments. Two-tailed unpaired Student's t-tests were performed. \*\* $p < 0.01$ ,  
361 \*\*\* $p < 0.001$ .

362

363

364

365

366

367

368

369

370

371

372

373

374

375

376

377

378

379

380

381

382

383

384

385

386

387

388

389

390

391

392

393

394

395

396

397

398

399

400

401

402

403

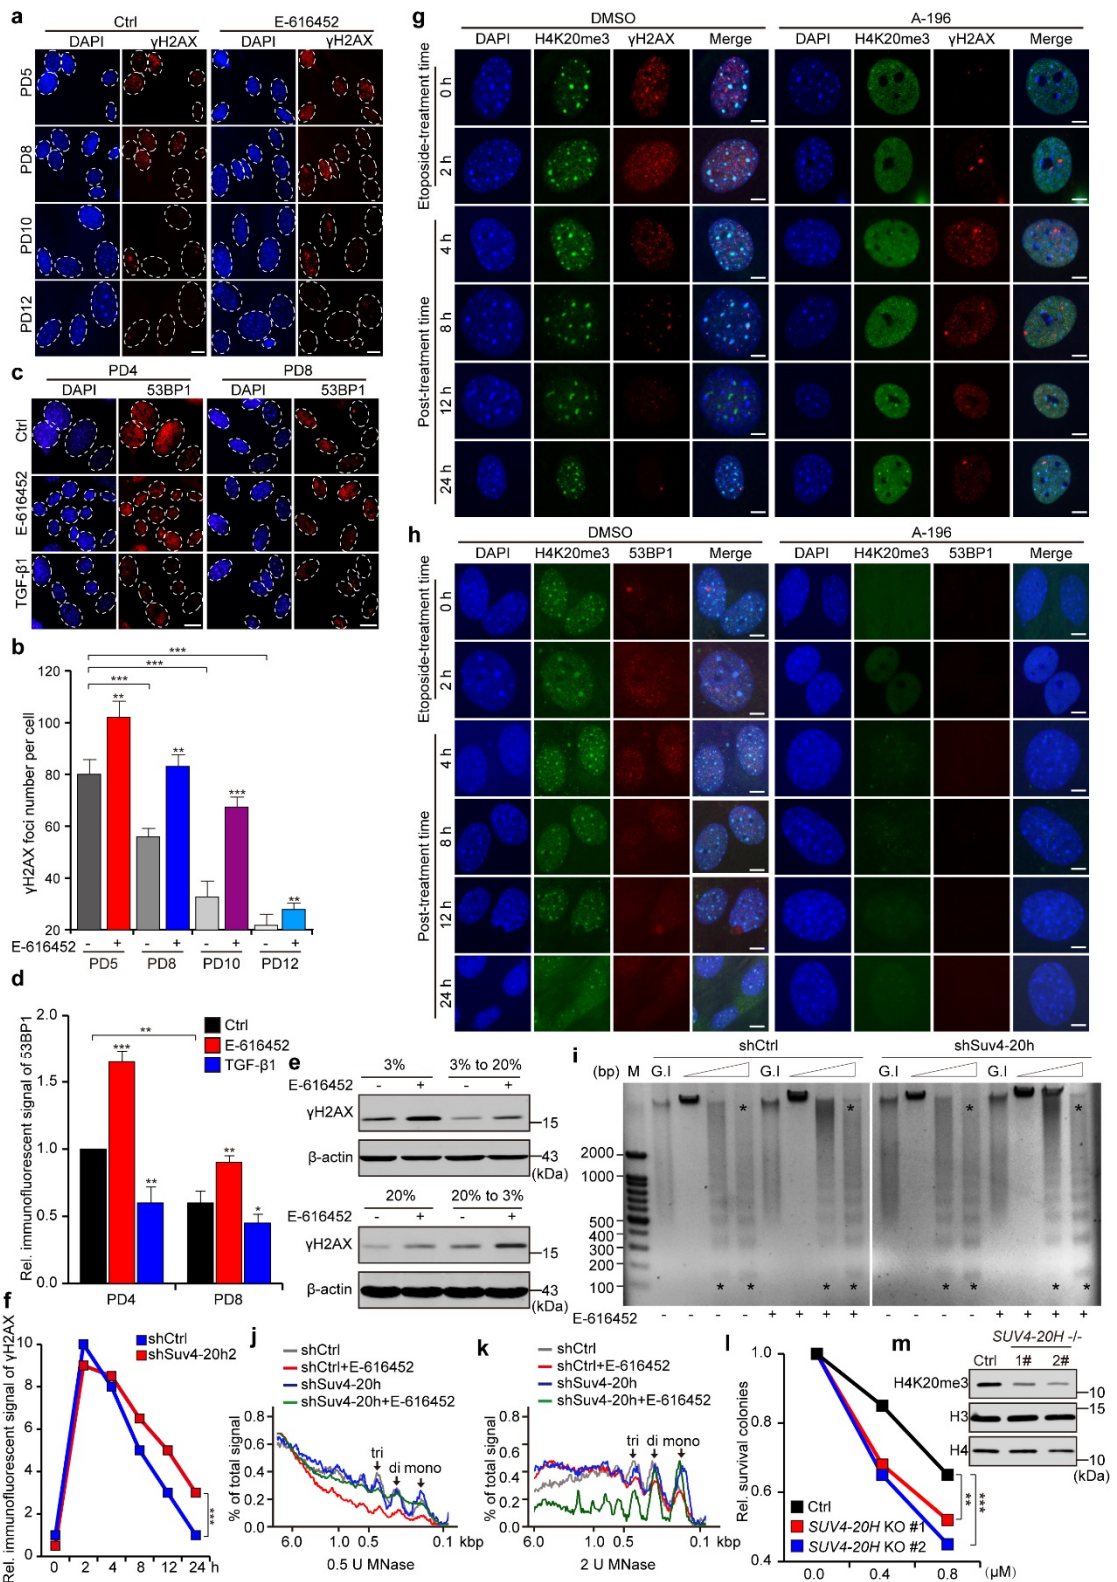

Supplementary Figure 6. Loss of H4K20me3 leads to DNA damage repair defects and lowers cell survival rates upon DNA damage stress.

404 **a, b**, Immunofluorescent staining of  $\gamma$ H2AX in serially passaged cells treated with or  
405 without E-616452 (**a**). Signals were analyzed by using ImageJ software (**b**). Scale bar,  
406 5  $\mu$ m. **c, d**, Immunofluorescent staining of 53BP1 from PD4 and PD8 cells treated with  
407 inhibitor or TGF- $\beta$ 1 (**c**). Signals were analyzed using ImageJ software (**d**). Scale bar, 5  
408  $\mu$ m. **e**, Protein levels of  $\gamma$ H2AX in cells treated with or without E-616452, were tested  
409 by western blotting. **f**, Statistical analysis of the  $\gamma$ H2AX signals in **Figure 5e**. **g, h**  
410 Immunofluorescent staining for  $\gamma$ H2AX (**g**) and 53BP1 (**h**) in cells incubated with A-  
411 196 for 48 h followed by etoposide treatment according to the indicated time course.  
412 Scale bar, 5  $\mu$ m. **i-k**, Nuclei from Suv4-20h knockdown cells treated with or without E-  
413 616452 and incubated with 0 U, 0.5 U or 2 U of MNase for 5 min followed by DNA  
414 extraction, agarose gel electrophoresis and ethidium bromide staining. The asterisks  
415 indicate prominent signal changes (**i**). Signals were analyzed using ImageJ software (**j**,  
416 **k**). **l**, Colonies analysis of **Figure 5k** using ImageJ software. **m**, Western blot for  
417 H4K20me3 in HEK293T (Ctrl) and *SUV4-20H*-knockout cells (*SUV4-20H*<sup>-/-</sup> #1 and  
418 #2). H3 served as a loading control. The error bars represent the s.d. obtained from  
419 triplicate independent experiments. Two-tailed unpaired Student's t-tests were  
420 performed. \*\*p<0.01, \*\*\*p<0.001.

421

422

423

424

425

426

427

428

429

430

431

432

433

434

435

436

437

438

439

440

441

442

443

444

445

446

447

448

449

450

451

452

453

454

455

456

457

458

459

460

461

462

463

464

465

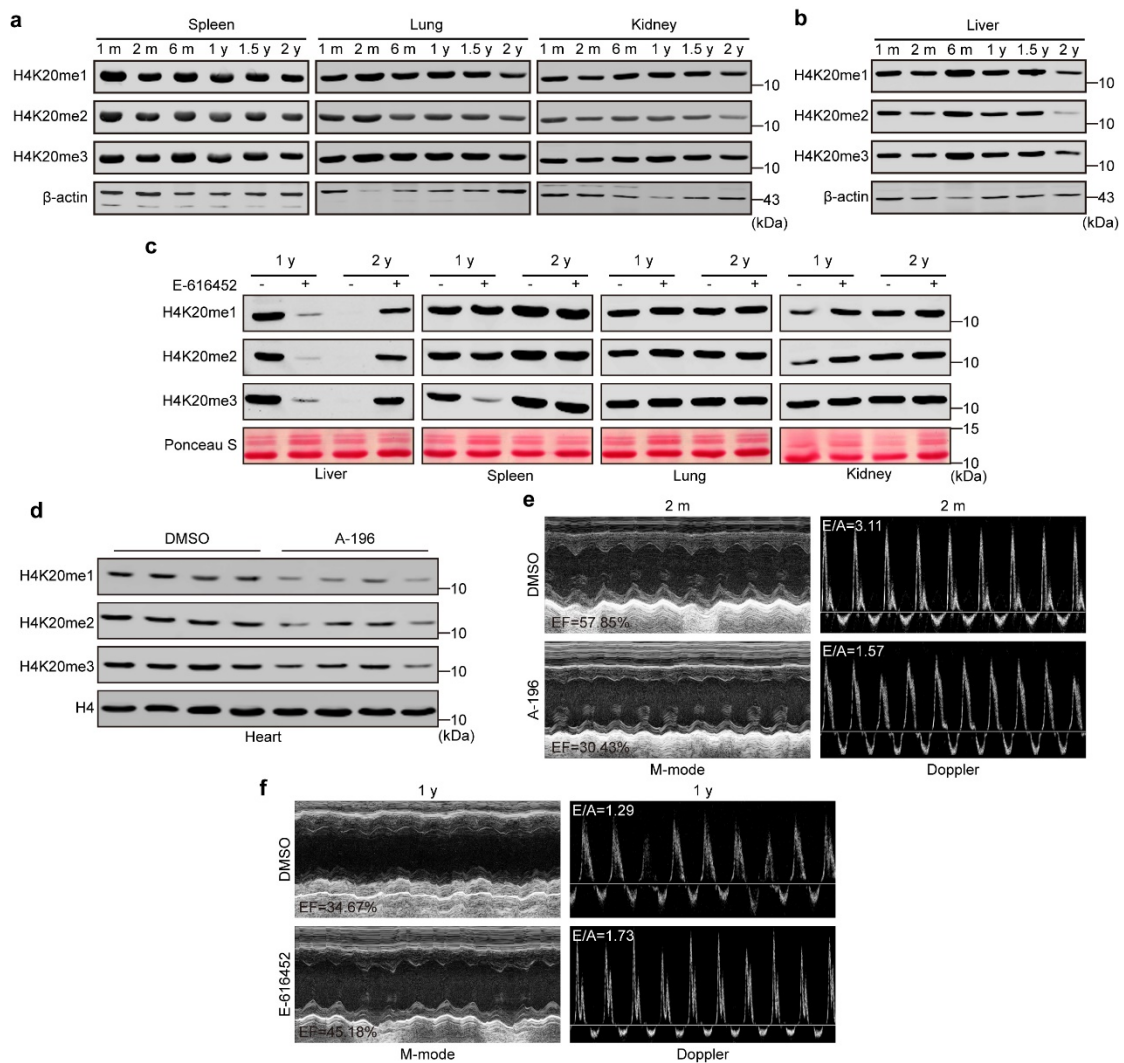

**Supplementary Figure 7. TGF- $\beta$  signaling regulates cardiac aging by reducing H4K20me3 abundance.**

**a**, Tissues (spleen, lung and kidney) collected from mice of the indicated age were used to test H4K20 methylation by western blotting. **b**, Western blot for H4K20 methylation in livers collected from **a**. **c**, Immunoblotting for H4K20 methylation in livers, spleens, lungs and kidneys collected from the indicated mice fed with E-616452. H4,  $\beta$ -actin and Ponceau S served as loading controls. **d**, Western blot for H4K20 methylation in hearts from two-month-old mice. Four mice were treated with vehicle (DMSO), whereas four mice were treated with A-196. H4 served as a loading control. **e**, **f**, Representative echocardiographs vehicle (DMSO)- or A-196-treated 2-month-old mice (2m, **e**) and DMSO- or E-616452-treated 1-year-old mice (1 y, **f**). Data were acquired under B-mode, M-mode and pulse-waved Doppler.

466  
467  
468  
469  
470  
471  
472  
473  
474  
475  
476  
477  
478  
479  
480  
481  
482  
483  
484  
485  
486  
487  
488  
489  
490  
491  
492  
493  
494  
495  
496

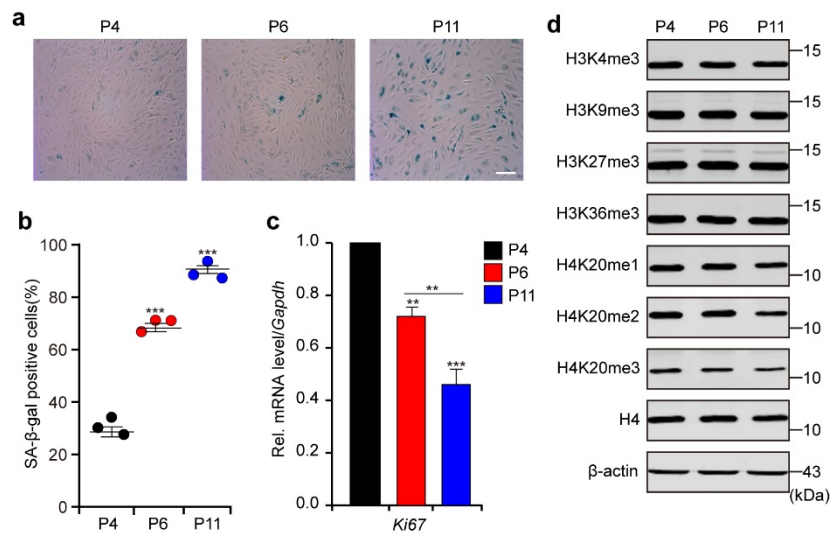

**Supplementary Figure 8. H4K20 methylation is attenuated during HUVECs senescence.**

**a-c**, HUVECs at different passage stages were subjected to SA-β-gal staining (**a, b**) and measurement of *Ki67* expression (**c**). Scale bar, 20 μm. One-way ANOVA with Dunnett's multiple comparison test was performed to analyze the SA-β-gal staining signals. **d**, The total protein levels of the indicated histone modifications were examined by immunoblotting. H4 and β-actin served as loading controls. The error bars represent the s.d. obtained from triplicate independent experiments. Two-tailed unpaired Student's t-tests were performed. \*\*p<0.01, \*\*\*p<0.001.



497

498

499

500

501

502

503

504

505

506

507

508

509

510

511

512

513

514

515

516

517

518

519

520

521

522

523

524

525

526

527

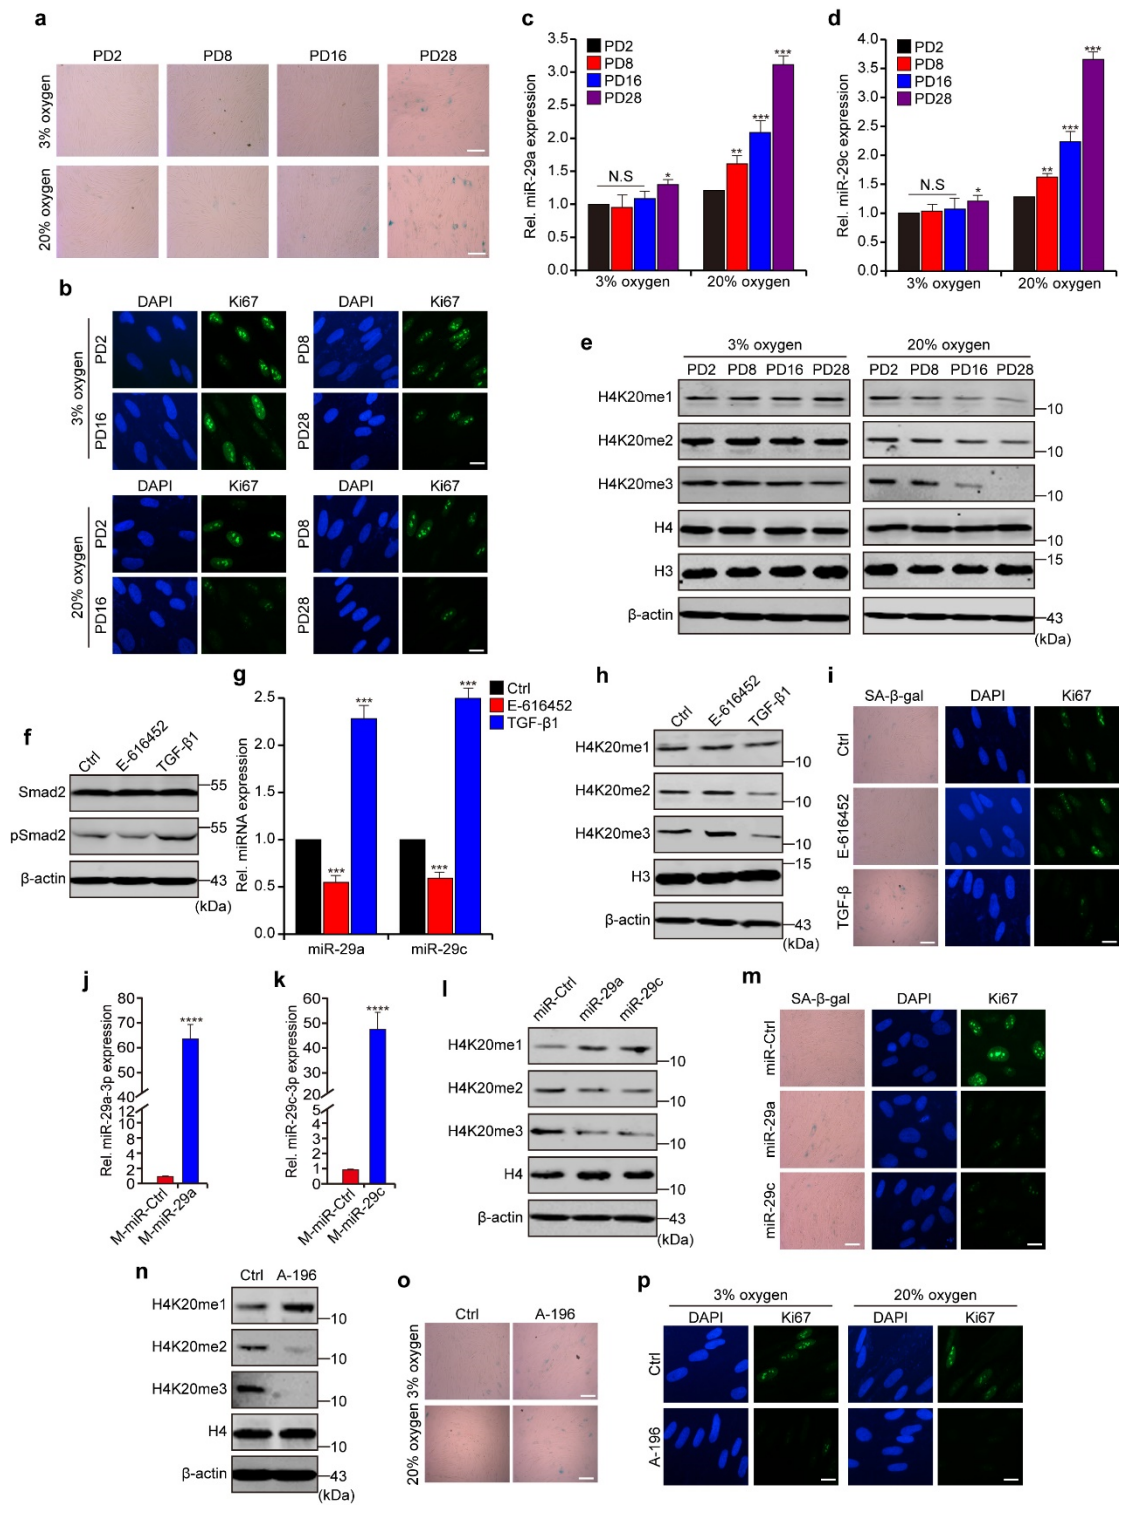

**Supplementary Figure 9. Activated TGF-β signaling promotes HEFs senescence by reducing H4K20me3 via induction of miR-29 expression.**

**a**, SA-β-gal staining of serially passaged HEFs (PD2, PD8, PD16 and PD28) individually grown in 3% and 20% oxygen. Scale bar, 20 μm. **b**, Immunofluorescent

528 staining of Ki67 of serially passaged HEFs cultured in 3% and 20% oxygen. Scale bar,  
529 5  $\mu$ m. **c, d**, RT-qPCR measurement of miR-29 expression in different passages of HEFs.  
530 miRNAs expression was normalized to U6. The error bar represents the s.d. from three  
531 independent replicates. \* $p < 0.05$ , \*\* $p < 0.01$ , \*\*\* $p < 0.001$ , Student's t-test was  
532 performed. **e**, Global H4K20 methylation was tested by western blotting in the HEFs  
533 from **a**. H3, H4 and  $\beta$ -actin served as loading controls. **f**, Immunoblotting for the  
534 indicated proteins in the presence of E-616452 or TGF- $\beta$ 1.  $\beta$ -actin served as a loading  
535 control. **g**, RT-qPCR measurement of miR-29 expression in different passages of HEFs.  
536 **h**, Western blots of the indicated proteins in the HEFs derived from **f**.  $\beta$ -actin served as  
537 a loading control. **i**, SA- $\beta$ -gal staining and immunofluorescent staining of Ki67 in HEFs  
538 with the same treatment as those in **f**. **j, k**, RT-qPCR measurement of miR-29 expression  
539 in HEFs with ectopic expression of miR-29 mimics. **l**, Western blot for total H4K20  
540 methylation in HEFs with ectopic miR-29 expression.  $\beta$ -actin served as a loading  
541 control. **m**, SA- $\beta$ -gal staining (left panel, scale bar, 20  $\mu$ m) and immunofluorescent  
542 staining of Ki67 (right panel, scale bar, 20  $\mu$ m) in HEFs with the same treatment as  
543 those in **l**. **n**, Immunoblotting of H4K20 methylation in cells treated with A-196.  $\beta$ -actin  
544 served as a loading control. **o, p**, SA- $\beta$ -gal staining (**o**, scale bar, 20  $\mu$ m) and  
545 immunofluorescent staining of Ki67 (**p**, scale bar, 5  $\mu$ m) in cells with the same  
546 treatment as those in **a**.

547

548

549

550

551

552

553

554

555

556

557

558

559

560

561

562

563

564

565

566

567

568

569

570

571

572

573

574

575

576

577

578

579

580

581

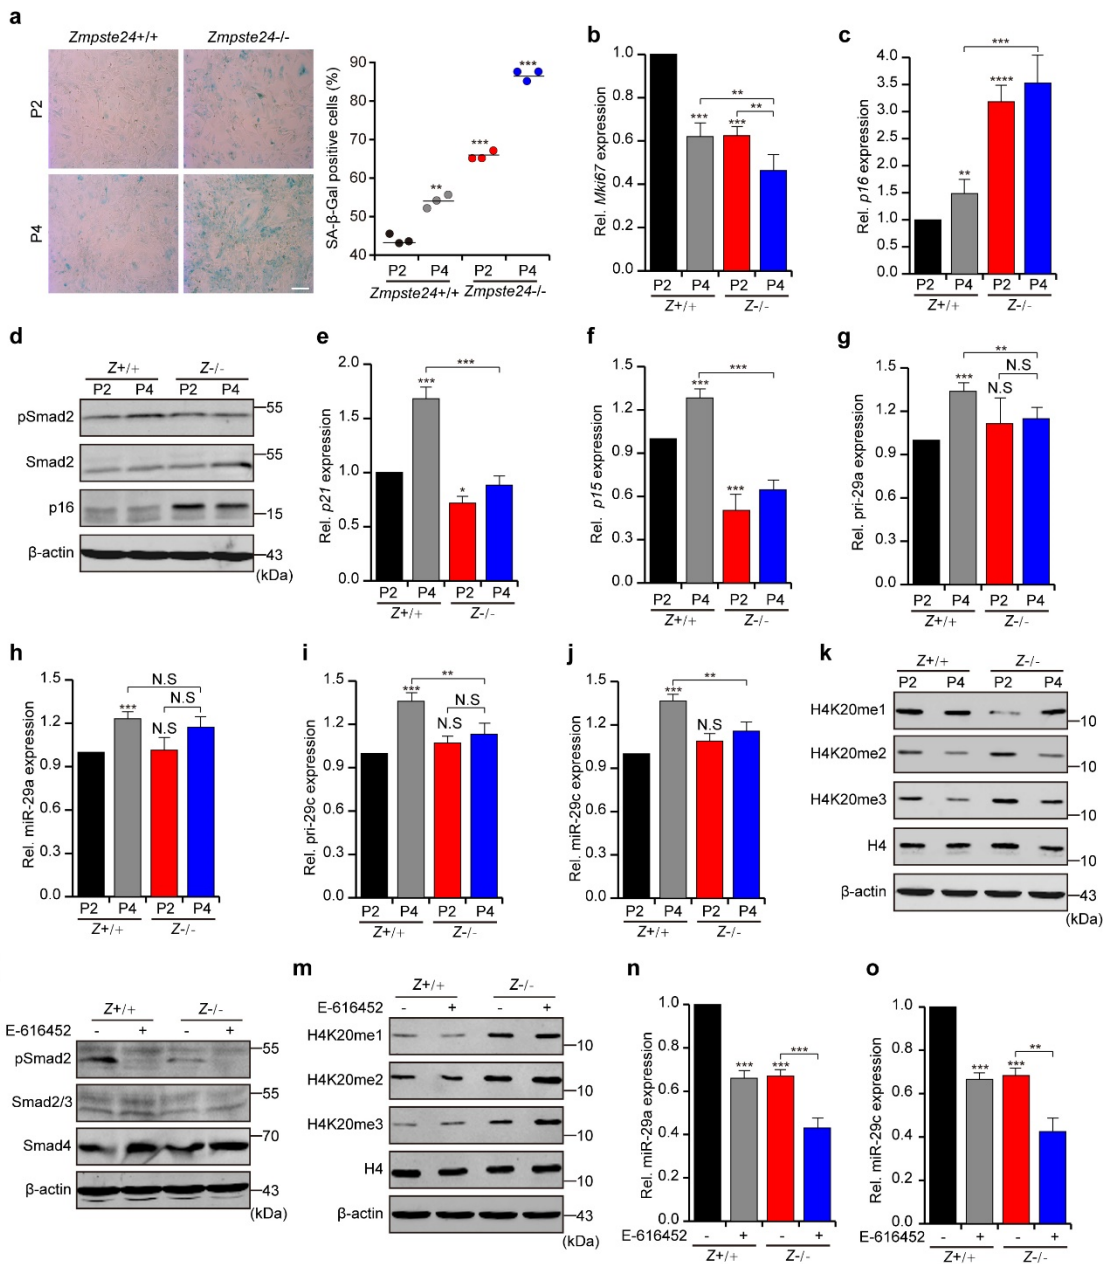

582 **Supplementary Figure 10. Depletion of *Zmpste24* blocks TGF-β-miR-29 signaling**  
 583 **in the HGPS mouse model.**

584 **a**, Serial passages (P2 and P4) of wild-type (*Zmpste24*<sup>+/+</sup>) and *Zmpste24*-knockout  
 585 (*Zmpste24*<sup>-/-</sup>) MEFs were subjected to SA-β-gal staining (left panel). Signals were  
 586 analyzed by ImageJ software. One-way ANOVA with Dunnett's multiple comparison  
 587 test was performed (right panel). **b**, **c**, mRNA expression levels of *Mki67* (**b**) and *p16*  
 588 (**c**) were tested by RT-qPCR and normalized to that of *Gapdh*. **d**, Total protein levels of  
 589 pSmad2, Smad2 and p16 were examined by immunoblotting in serially passaged wild-

590 type and *Zmpste24*-knockout cells.  $\beta$ -actin served as a loading control. **e-j**, RT-qPCR  
591 measurement of the indicated genes (*p21*, **e** and *p15*, **f**) and miRNAs (pri-miR-29 and  
592 miR-29, **g-j**). Expression of mRNA and pri-miRNA was normalized to that of *Gapdh*  
593 and expression of miRNA was normalized to that of U6. Two-tailed unpaired Student's  
594 t-tests were performed. The error bars represent the s.d. obtained from triplicate  
595 independent experiments. **k**, Western blot for H4K20 methylation in the cells from **d**.  
596  $\beta$ -actin served as a loading control. **l, m**, Immunoblotting of the indicated proteins in  
597 late-passage (P6) wild-type and *Zmpste24*-knockout MEFs treated with or without E-  
598 616452.  $\beta$ -actin and H4 served as loading controls. **n, o**, RT-qPCR measurement of  
599 miR-29a (**n**) and miR-29c (**o**) expression in cells from **l**.  $Z^{+/+}$  and  $Z^{-/-}$  represent wild-  
600 type and *Zmpste24* knockout cells in **b-o**, respectively. \* $p < 0.05$ , \*\* $p < 0.01$ , \*\*\* $p < 0.001$ .

601

602

603

604

605

606

607

608

609

610

611

612

613

614

615

616

617

618

619

620

621

622

623

624

625

626

627

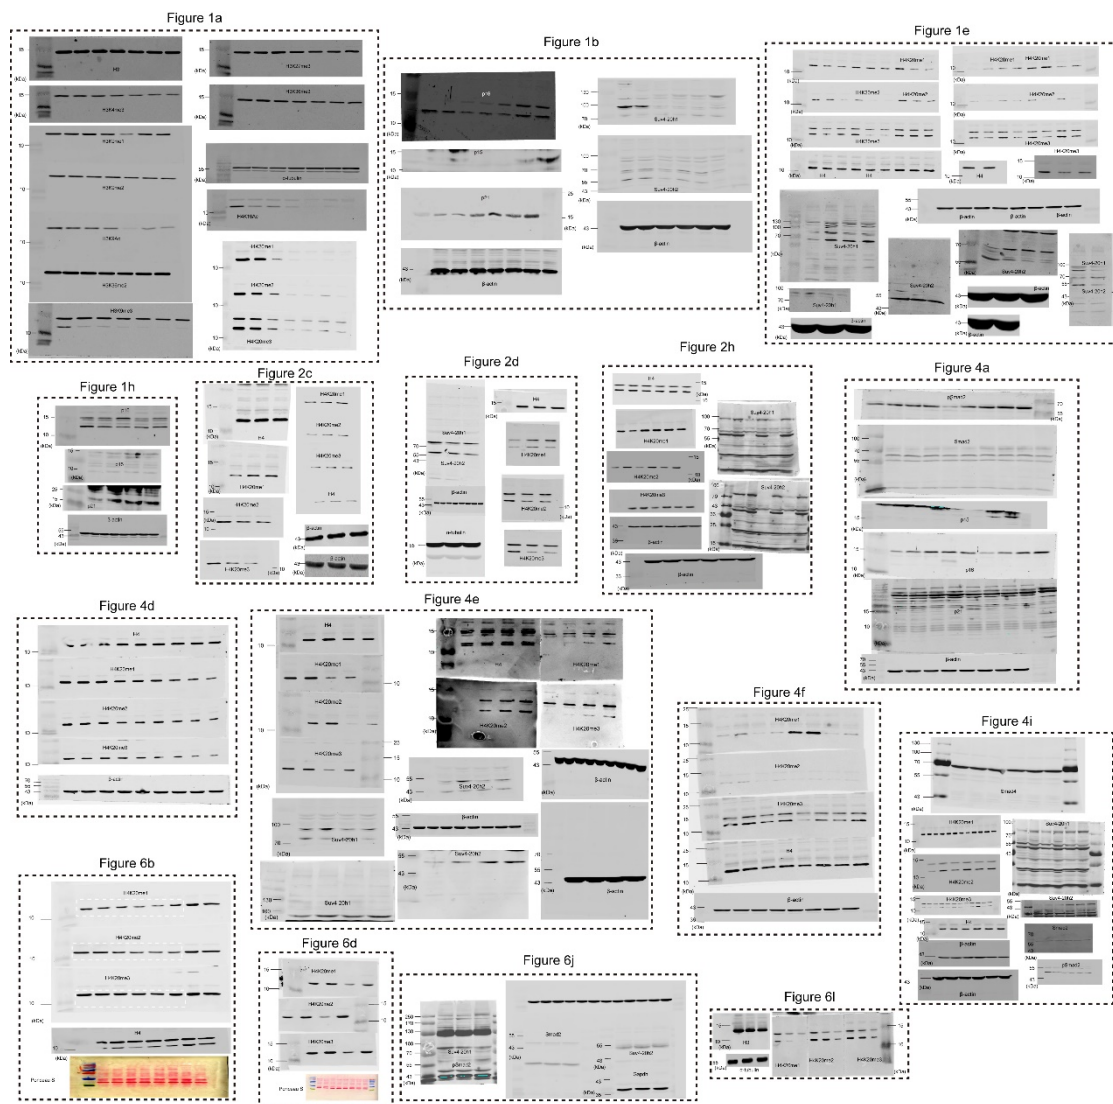

641 **Supplementary Figure 11.** Uncropped scans of Western blots from Fig. 1a, b, e, h; Fig.

642 2c, d, h; Fig. 4a, d, e, f, i; Fig. 6b, d, j, l

643

644

645

646

647

648

649

650

651

652  
653  
654  
655  
656  
657  
658  
659  
660  
661  
662  
663  
664  
665  
666  
667  
668  
669  
670  
671  
672  
673  
674  
675  
676  
677  
678  
679  
680  
681  
682

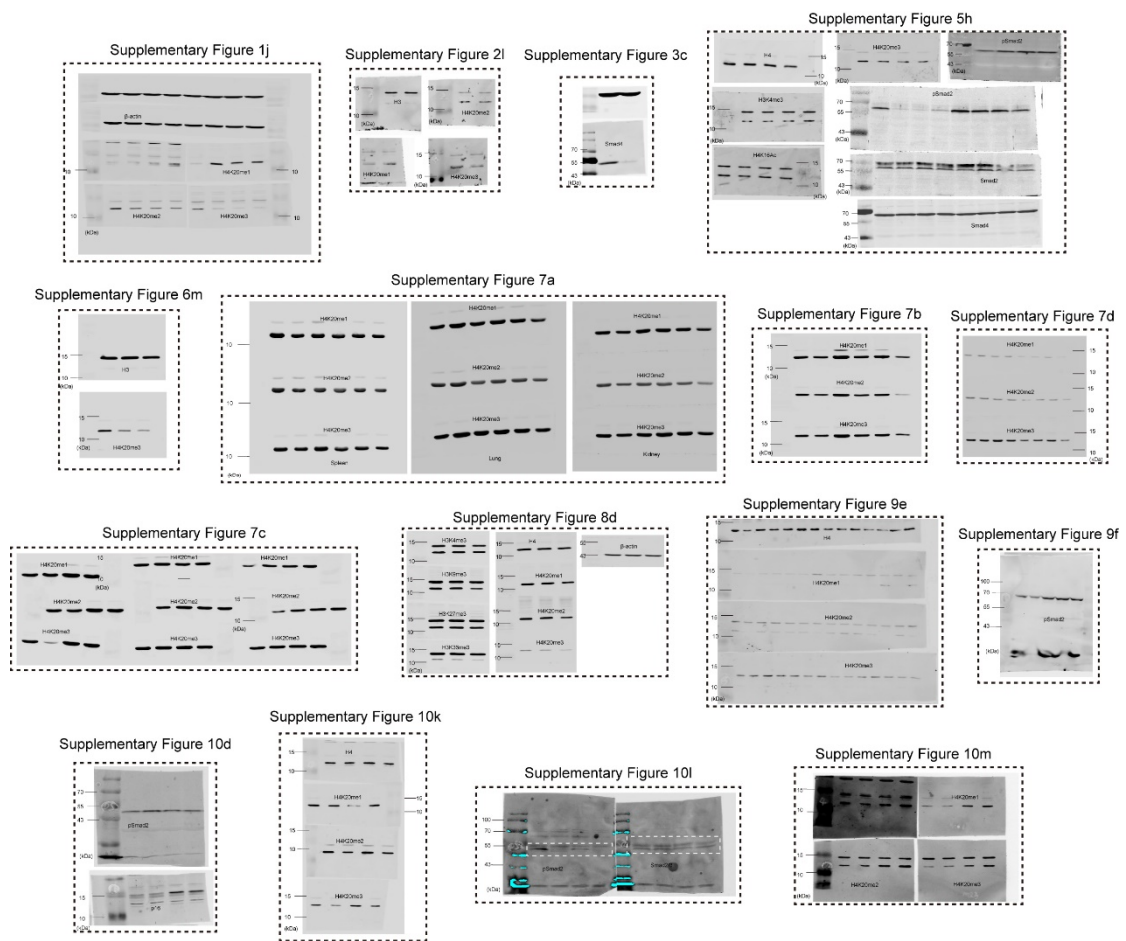

**Supplementary Figure 12.** Uncropped scans of Western blots from Supplementary Fig. 1j, Supplementary Fig. 2l; Supplementary Fig. 3b,c; Supplementary Fig. 5h, Supplementary Fig. 6m; Supplementary Fig. 7a, b, c, d; Supplementary Fig. 8d; Supplementary Fig. 9e, f; Supplementary Fig. 10d, k, l, m.

683

684

**Supplementary Table 1 Diastolic and systolic data of left ventricle**

685

|         | 2 m (DMSO)        | 2 m (A -196)      | 1 y (DMSO)        | 1 y (E-616452)    |
|---------|-------------------|-------------------|-------------------|-------------------|
| LVAW; d | 0.799<br>mm±0.054 | 0.632<br>mm±0.021 | 1.172<br>mm±0.027 | 1.385<br>mm±0.038 |
| LVID; d | 3.622<br>mm±0.115 | 4.128<br>mm±0.120 | 4.181<br>mm±0.160 | 3.956<br>mm±0.113 |
| LVPW; d | 0.826<br>mm±0.031 | 0.852<br>mm±0.043 | 0.959<br>mm±0.061 | 0.873<br>mm±0.057 |
| LVAW; s | 1.065<br>mm±0.041 | 1.092<br>mm±0.026 | 1.278<br>mm±0.016 | 1.225<br>mm±0.034 |
| LVID; s | 2.876<br>mm±0.053 | 4.234<br>mm±0.106 | 3.222<br>mm±0.082 | 2.476<br>mm±0.133 |
| LVPW; s | 0.692<br>mm±0.026 | 0.639<br>mm±0.017 | 0.985<br>mm±0.024 | 0.905<br>mm±0.027 |

686

Diastolic and systolic parameters of left ventricle under B- and M-mode. ± represents  
 687 s.d. from mice of each group, respectively. Numbers of mice per group were indicated  
 688 in the legend of **Figure 6e,f**. LVAWd, left ventricular anterior wall thickness at end-  
 689 diastole; d, diastole; LVIDd, left ventricular internal dimension at end-diastole; LVPWd,  
 690 left ventricular posterior wall thickness at end-diastole; LVAWs, left ventricular anterior  
 691 wall thickness at end-systole; s, systole; LVIDs, left ventricular internal dimension at  
 692 end-systole; LVPWs, left ventricular posterior wall thickness at end-systole.

693

694

695

696

697

698

699

700

701

702

703

**Supplementary Table 2 Primers used in our study**

| Target                    | Forward (5'-3')            | Reverse (5'-3')             |
|---------------------------|----------------------------|-----------------------------|
| qPCR <i>Mki67</i>         | ATCATTGACCGCTCCTTTAGGT     | GCTCGCCTTGATGGTTCCT         |
| qPCR <i>Suv4-20h1</i>     | ACTAGCGCCTTTCCTTCGAG       | GCCGAAATCTCACAGGATTGTTG     |
| qPCR <i>Suv4-20h2</i>     | GCAGAGCTGCGTGAAGAGG        | ACAGGCAGTATTTCCCATCTGA      |
| qPCR <i>p16</i>           | CGCAGGTTCTTGGTCACTGT       | TGTTACAGAAAGCCAGAGCG        |
| qPCR <i>p21</i>           | CCTGGTGATGTCCGACCTG        | CCATGAGCGCATCGCAATC         |
| qPCR <i>p15</i>           | CCCTGCCACCCCTTACCAGA       | CAGATACCTCGCAATGTCACG       |
| qPCR <i>Tgfb1</i>         | GGCGGTGCTCGCTTTGT          | GCGGGTGACCTTTTAGCATAG       |
| qPCR <i>Tgfb2</i>         | CGGAGCGACGAGGAGTA          | CGGACGATTCTGAAGTAGGGT       |
| qPCR <i>Tgfb3</i>         | GGACTGGCGGAGCACAA          | CGCTGCTTGGCTATGTGC          |
| qPCR <i>Serpine1</i>      | CTTCAGCCCTTGCTTGCC         | GGACCACCTGTGAAACACT         |
| qPCR <i>Ryr</i>           | GCAGGTGGATGTGGAA           | GTAGGAATGGCGTAGCA           |
| qPCR <i>Myh7</i>          | GAATGGCAAGACGGTGAC         | TCCAGGAAGCGTAGCG            |
| qPCR <i>Ki67</i>          | GCCTGCTCGACCCTACAGA        | GCTTGTCAACTGCGGTTGC         |
| qPCR <i>Gapdh</i>         | GTGTTCTACCCCAATGTGT        | ATTGTCATACCAGGAAATGAGCTT    |
| qPCR <i>GAPDH</i>         | AGCCACATCGCTCAGACAC        | GCCCAATACGACCAATCC          |
| qPCR Pri-miR-29a          | AGCCCTGAAGTAAGTGTC         | AGGTCTTCATCCGAGCAT          |
| qPCR Pri-miR-29c          | ATGGGTGGAAGAGGGTT          | TCTCCAGGTTACAGACGAG         |
| qPCR mmu-miR-29a-3p       | GGCTAGCACCATCTGAAATCGGTTA  |                             |
| qPCR mmu-miR-29c-3p       | GGCTAGCACCATTGAAATCGGTTA   |                             |
| qPCR mmu-miR-29b-3p       | GCGTAGCACCATTGAAATCAGTGTT  |                             |
| qPCR U6                   | CGCAAGGATGACACGCAAATTC     |                             |
| ChIP miR-29a -414- -208   | AACTATTGCACGGACTTCACCTTC   | CTGGACACTTACTTCAGGGCTGTAC   |
| ChIP miR-29a -621- -415   | AGTAAAAAGTGTCACGCTTATCAAAA | CCTAATTTACAGCGATCCTATG      |
| ChIP miR-29a -828- -622   | GCAGCAGTACTGATGATAGTGATAA  | TCCAGATCGATCTGTTAGAGTCG     |
| ChIP miR-29a -1035- -829) | TTATTGGAGTCCCTGACACATTC    | TACTGCTACTACTATTACAGTTTTAAA |
| ChIP miR-29a -1236- -1021 | GATTTGAGAATGAGCAGGAA       | CAGGGACTCCAATAACTACAC       |
| ChIP miR-29a -1656- -1450 | GTCCCATGCACACTGGCTACTTC    | GTTCTTACTGAATIGTTTGAAGCA    |
| ChIP miR-29a -1780- -1559 | AATAGATTCCCAGTCTGTAGC      | CTACCCGAGGAAACAAAC          |
| ChIP miR-29a -2001- -1752 | CCGAGCTCATTCTCCAGCCC       | GGTGCCAGGCTACAGACTGGG       |
| ChIP miR-29c -207- -1     | GGGTTCCCTTGGGCTGCAC        | GGACCGACTGGTGGTGTTCCTTC     |



|                                 |                             |                            |
|---------------------------------|-----------------------------|----------------------------|
| ChIP miR-29c -414- -208         | CACAGCAGAGGGTAGACTACAGAGG   | TCTTCCACCCATGGAATGCTG      |
| ChIP miR-29c -621- -415         | GCTCAAAGTGTGGCTGTATG        | CTGCAATTCTTACTCCTAAAACAC   |
| ChIP miR-29c -828- -622         | GTTGTTAACATCTCATAGGTCATTG   | AGACAAAAACAATGCAAAGCTT     |
| ChIP miR-29c -1035- -829        | AGGTACATTTTAAAACATACCTTGTT  | TGAACCCAAGTAAGTCACCTGTG    |
| ChIP miR-29c -1242- -1036       | TCACATTATATTGCTCTATTACCC    | AAAAATAAGATTACAAGCTATGTT   |
| ChIP miR-29c -1449- -1243       | CCCCTCCCCAGTCTAGCTCT        | GTATCCCCAGAGTCACAATATTCAA  |
| ChIP miR-29c -1656- -1450       | GAGAAGTCAGTGCAGCATTGCTAG    | GATTTAGCTCAGACAATCTGGATGG  |
| ChIP miR-29c -1863- -1657       | ACTGCCATCTAATCTATTTATGACC   | AGAAACTGGGCCAGCCA          |
| ChIP miR-29c -2001- -1864       | CATAGAGGGAGGGGATTGG         | TATTAACAAGGGTCAAAATCCTG    |
| Promoter miR-29a-3p             | GGGGTACCCCGAGCTCATTCTCCAGCC | CGCTCGAGCACAAGAGGTCATGTGCA |
| Promoter miR-29c-3p             | GGGGTACCCATAGAGGGAGGGGATTG  | CGCTCGAGGGACCGACTGGTGGTGT  |
| 3' UTR- <i>Suv420h1</i>         | GAGCTCTTGAATCTTGTGCGTGAC    | GTCGACCTCTTACATTGAATCCC    |
| 3' UTR- <i>Suv420h1</i> -Mut    | CAAGAATGATCGCTACCTATTTTTTC  | TAGGTAGCGATCATTCTTGCAAAG   |
| 3' UTR- <i>Suv4-20h2</i>        | CGAGCTCCTTACAGGGAGCGGAATG   | GCGTCGACCCAGTAGCACCAGGGATA |
| 3' UTR- <i>Suv4-20h2</i> -Mut   | GAGTCCTTACAGGGAGCGGAATGGA   |                            |
| 3' UTR- <i>Suv4-20h2</i> -Mut-1 |                             | GTCGACCCAGTTGGAGCTGGGATAGC |
| 3' UTR- <i>Suv4-20h2</i> -Mut-2 |                             | GTCGACCCAGTAGCACCAGGGATTGG |
